# Supplementary material for: HIF-1α-PDK1 axis-induced active glycolysis plays an essential role in macrophage migratory capacity
Source: PubMed Central journal article supplement (PMC4873978; doi:10.1038/ncomms11635), 2016-05-18
Supplement: ncomms11635-s1.pdf [file ncomms11635-s1.pdf]

# Supplementary Figures

## Figure-S1 (Takeda)

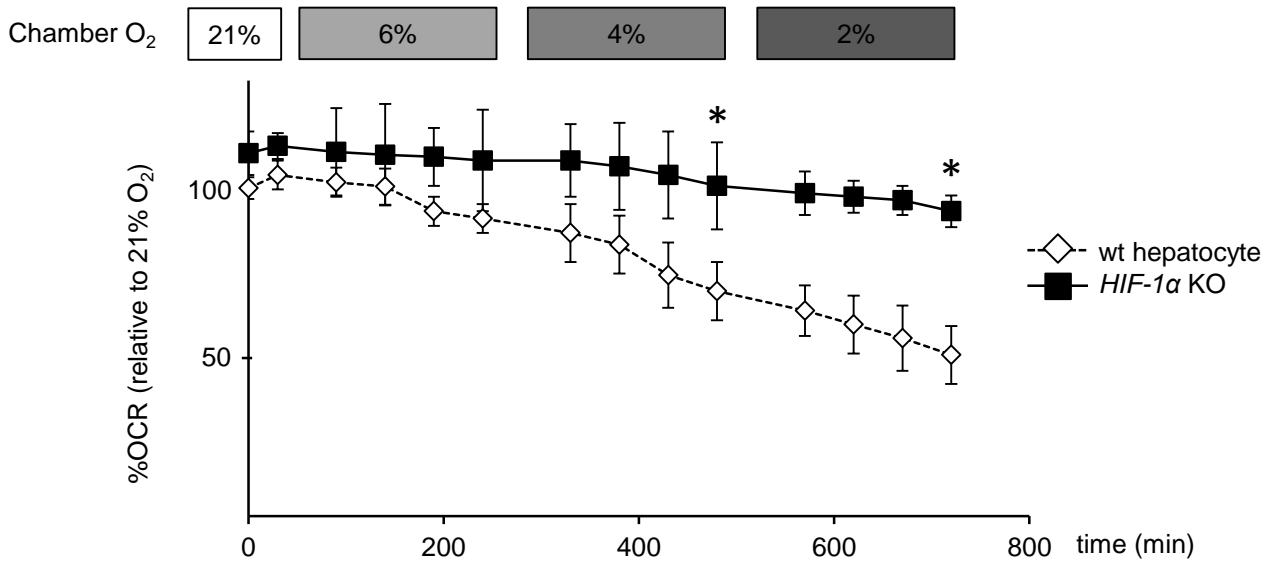

Hypoxia-induced glycolytic reprogramming was observed in hepatocytes. The ratio of oxygen consumption rate (%OCR) of hepatocyte in mild hypoxia was plotted as % relative to 21% O<sub>2</sub> (y-axis) vs. time (x-axis). wt hepatocyte, *Alb-Cre<sup>-/-</sup> HIF-1 $\alpha$ <sup>fllox/fllox</sup>* mice; *HIF-1 $\alpha$  KO, Alb-Cre<sup>+/-</sup> HIF-1 $\alpha$ <sup>fllox/fllox</sup>* mice; \*,  $P < 0.05$  wt hepatocyte versus *HIF-1 $\alpha$  KO*; 21%, 8%, 6%, 4%, O<sub>2</sub> concentration, respectively.

# Figure-S2 (Takeda)

**a**

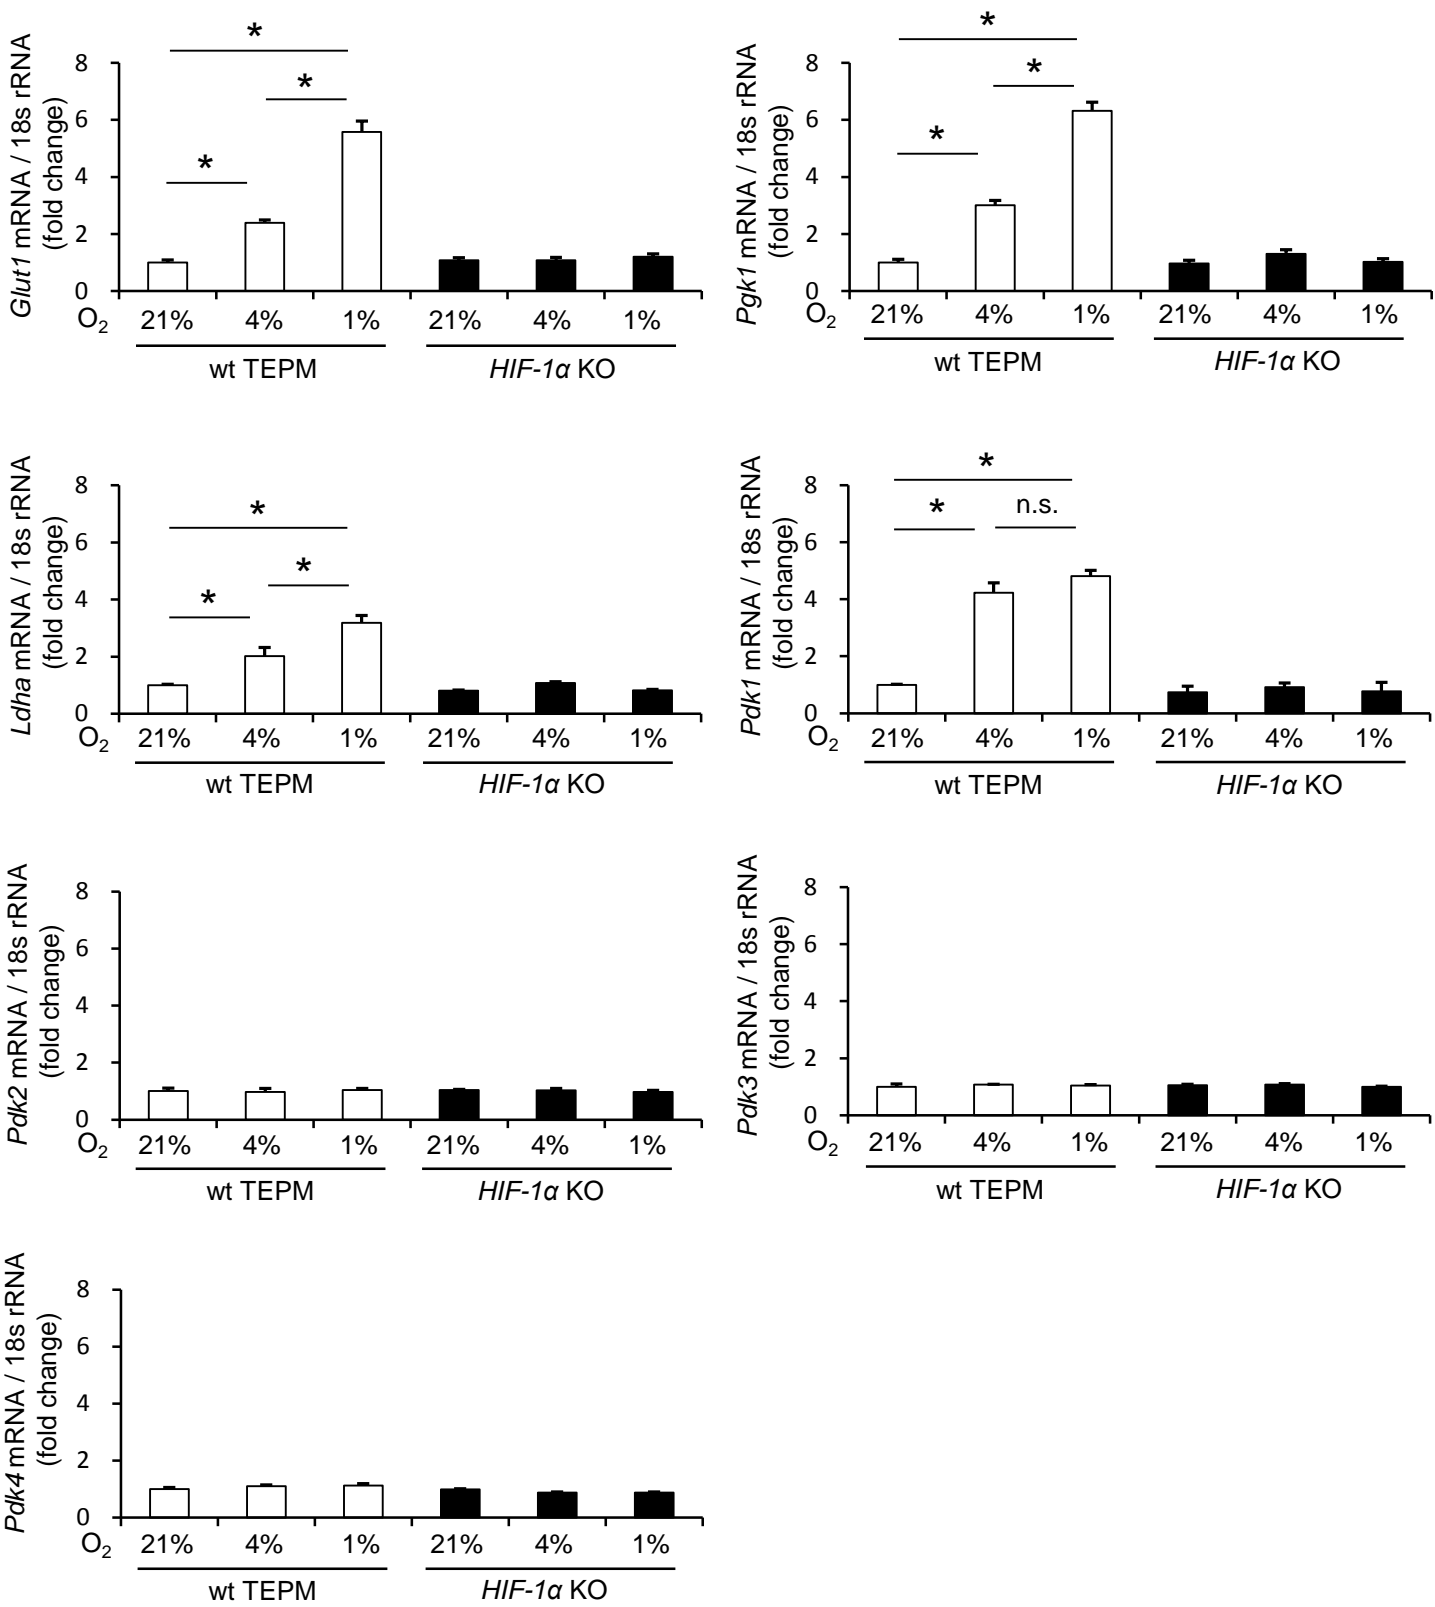

# Figure-S2 (Takeda)

**b**

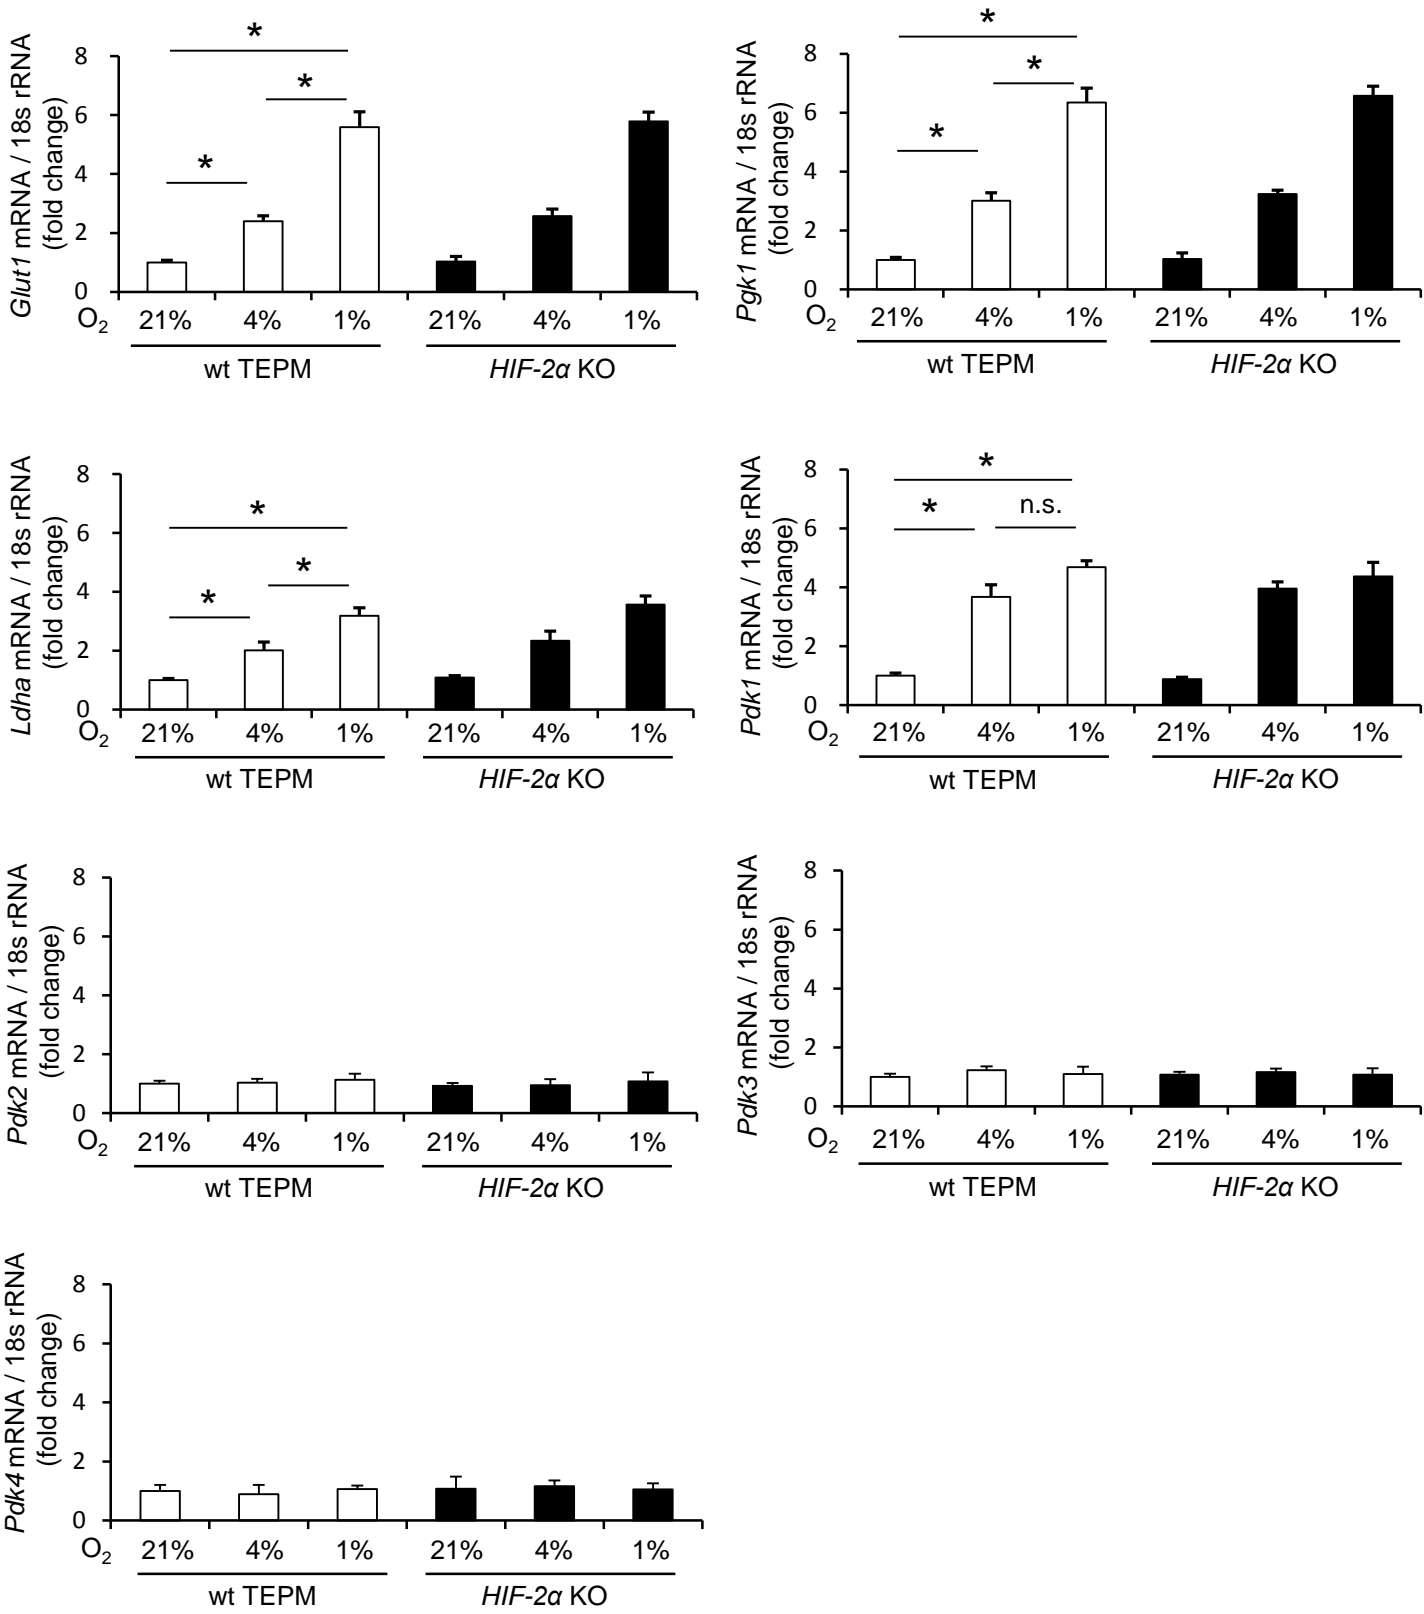

# Figure-S2 (Takeda)

**c**

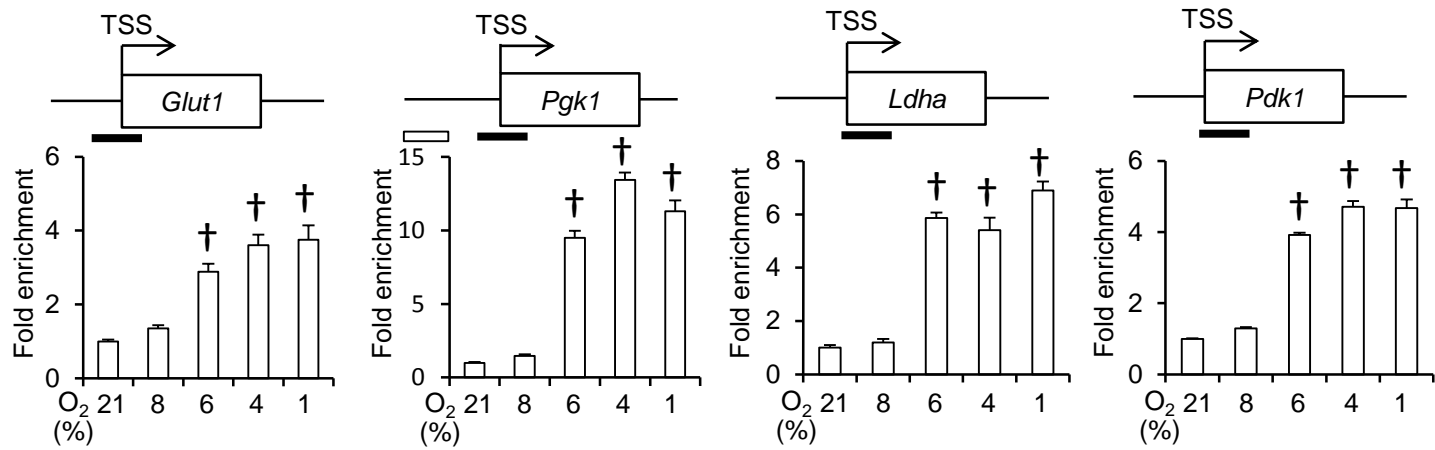

**d**

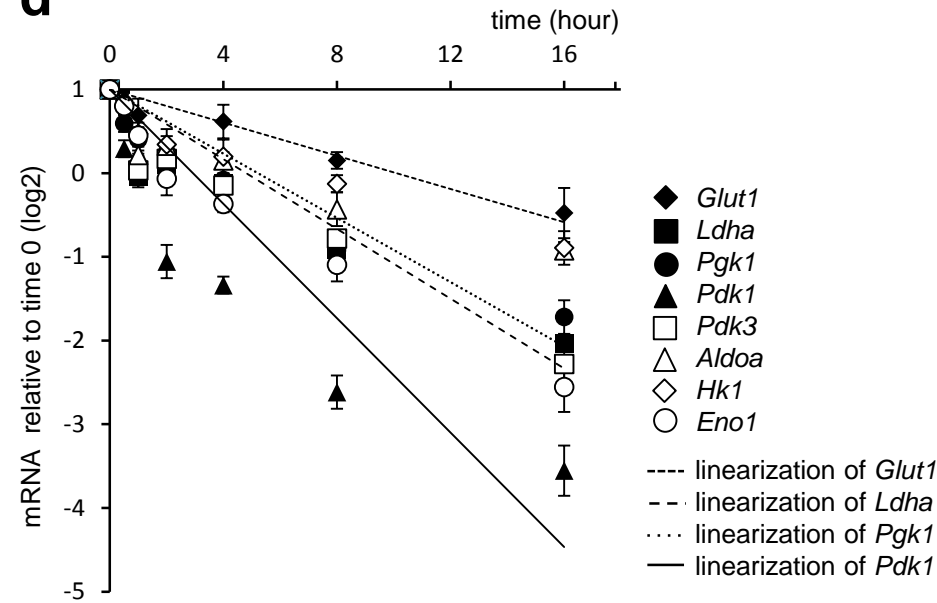

(a)(b) The gene expressions of glycolytic enzymes in normoxia (21 %  $O_2$ , 4h), mild hypoxia (4 %  $O_2$ , 4h) and severe hypoxia (1 %  $O_2$ , 4h) were assessed by quantitative RT-PCR.  $n = 3$  animals.

(c) ChIP PCR analysis of HIF-1 $\alpha$  binding to HRE. Black bar indicates the region amplified with quantitative RT-PCR in the schemas and represents the location of the Hypoxia Responsive Elements (HRE) in the promoter / enhancer of the HIF-1 $\alpha$  target gene (See Supplementary Table 2 for sequence). White bar indicates the upstream region of *Pgk1* as a negative control, the region without HRE. Real-time PCR quantification of HIF-1 $\alpha$  binding to these HREs is indicated as the relative enrichment compared to the binding to the negative control region.  $n = 3$  animals.

(d) Wild-type TEPMs were treated with actinomycin D (5 mM) and the total RNA was collected every 4hr up to 16hr. The mRNA abundances of HIF-1 $\alpha$  target genes are shown as relative to time 0.  $n = 3$  animals.

All graphs indicate average with SD. \*,  $P < 0.05$ ; n.s., not significant; †,  $P < 0.05$  vs control (21%  $O_2$ ); wt TEPM in (a), *Tie2-Cre<sup>-/-</sup> HIF-1 $\alpha$ <sup>fllox/fllox</sup>* mice; *HIF-1 $\alpha$*  KO in (a), *Tie2-Cre<sup>+/-</sup> HIF-1 $\alpha$ <sup>fllox/fllox</sup>* mice; wt TEPM in (b), *Tie2-Cre<sup>-/-</sup> HIF-2 $\alpha$ <sup>fllox/fllox</sup>* mice; *HIF-1 $\alpha$*  KO in (a), *Tie2-Cre<sup>+/-</sup> HIF-2 $\alpha$ <sup>fllox/fllox</sup>* mice.

# Figure-S3 (Takeda)

**a**

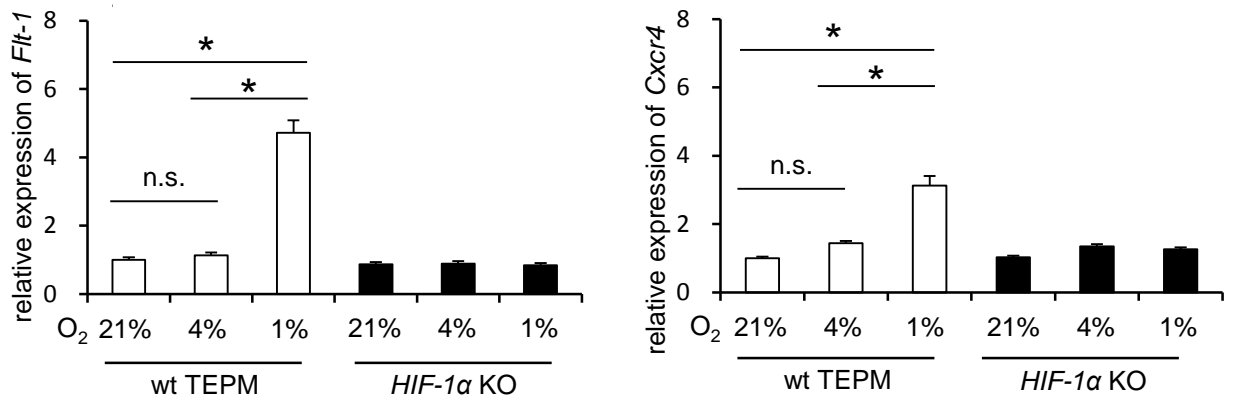

**b**

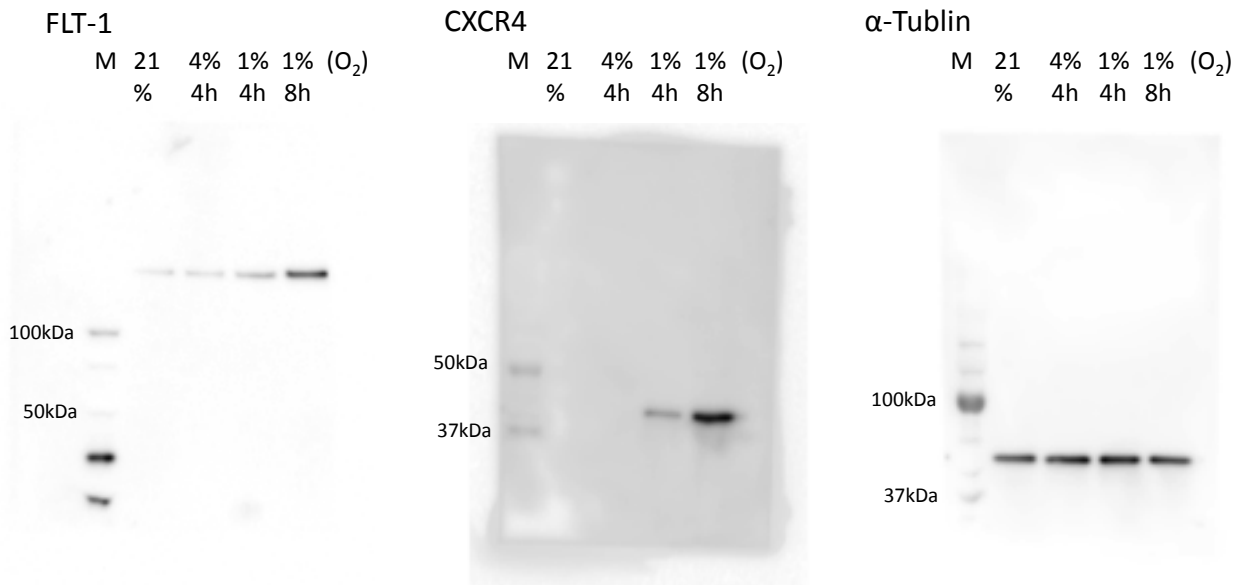

(a) The gene expressions of *Flt-1* and *Cxcr4* in normoxia (21 % O<sub>2</sub>, 4h), mild hypoxia (4 % O<sub>2</sub>, 4h) and severe hypoxia (1 % O<sub>2</sub>, 4h) were assessed by quantitative RT-PCR.  $n = 3$  animals. All graphs indicate average with SD. \*,  $P < 0.05$ ; n.s., not significant; wt TEPM, *Tie2-Cre<sup>-/-</sup> HIF-1 $\alpha$ <sup>fllox/fllox</sup>* mice; *HIF-1 $\alpha$*  KO, *Tie2-Cre<sup>+/-</sup> HIF-1 $\alpha$ <sup>fllox/fllox</sup>* mice.

(b) Immunoblot analysis of FLT-1 and CXCR4 in wild-type TEPMs under each O<sub>2</sub> concentration (21%, 4% 4h, 1% 4h or 1% 8h).  $\alpha$ -Tubulin was used as a loading control.

# Figure-S4 (Takeda)

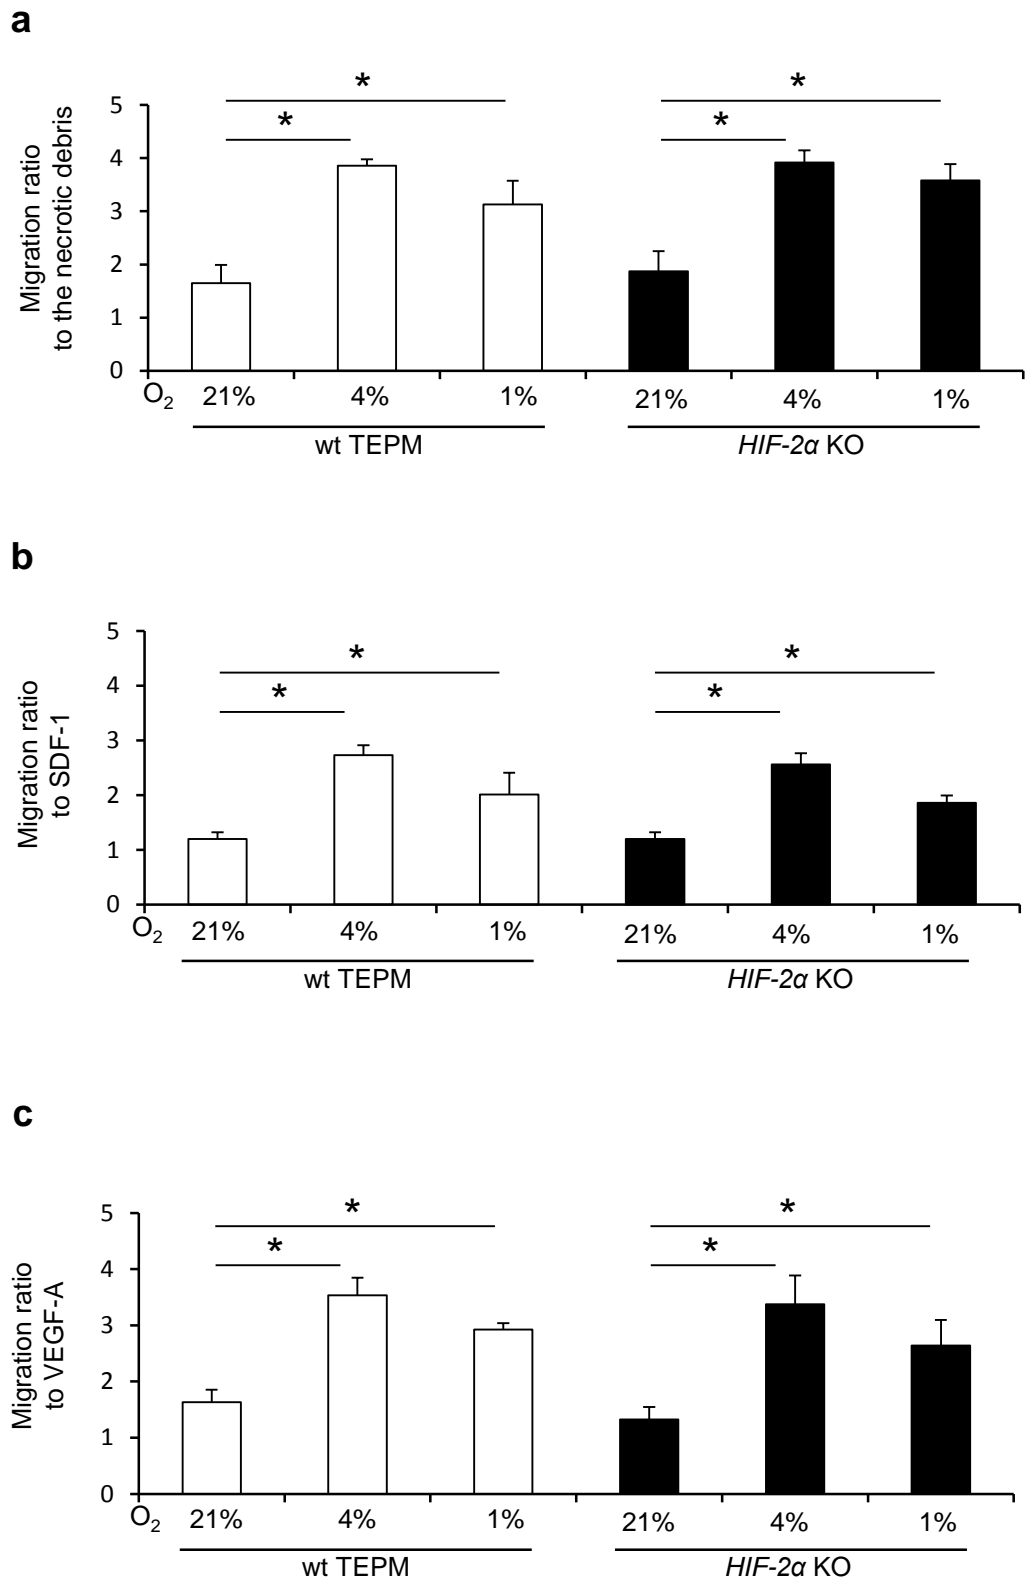

Macrophage motility of control and HIF-1α deficient macrophages to various chemoattractants was measured in the same manner as Figure 4(c). *n* = 3 animals per group. All graphs indicate average with SD. \*, *P* < 0.05; wt TEPM, *Tie2-Cre*<sup>-/-</sup> *HIF-2α*<sup>flox/flox</sup> mice; *HIF-2α* KO, *Tie2-Cre*<sup>+/-</sup> *HIF-2α*<sup>flox/flox</sup> mice.

# Figure-S5 (Takeda)

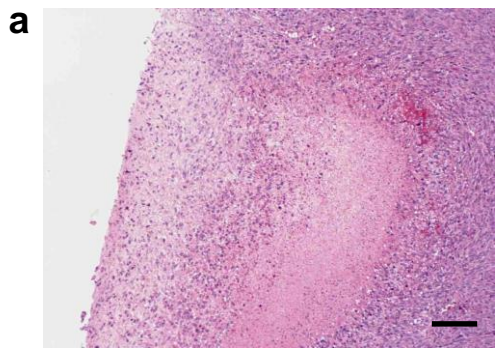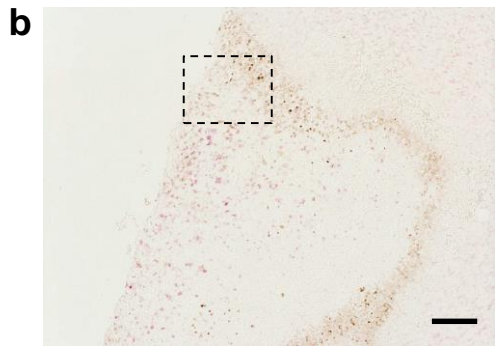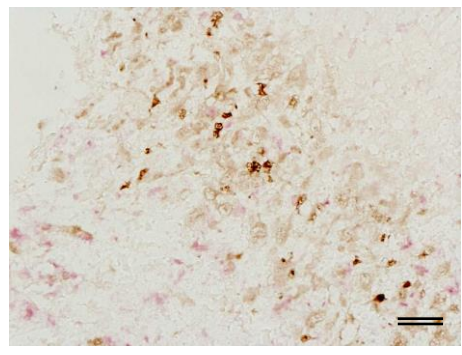

Representative immunohistochemical staining of Hematoxylin and eosin (a), Pimonidazole (brown) and F4/80 (red) (b) in LL2 xenograft model. Scale bar, single line = 200µm, double line = 50µm.

# Figure-S6 (Takeda)

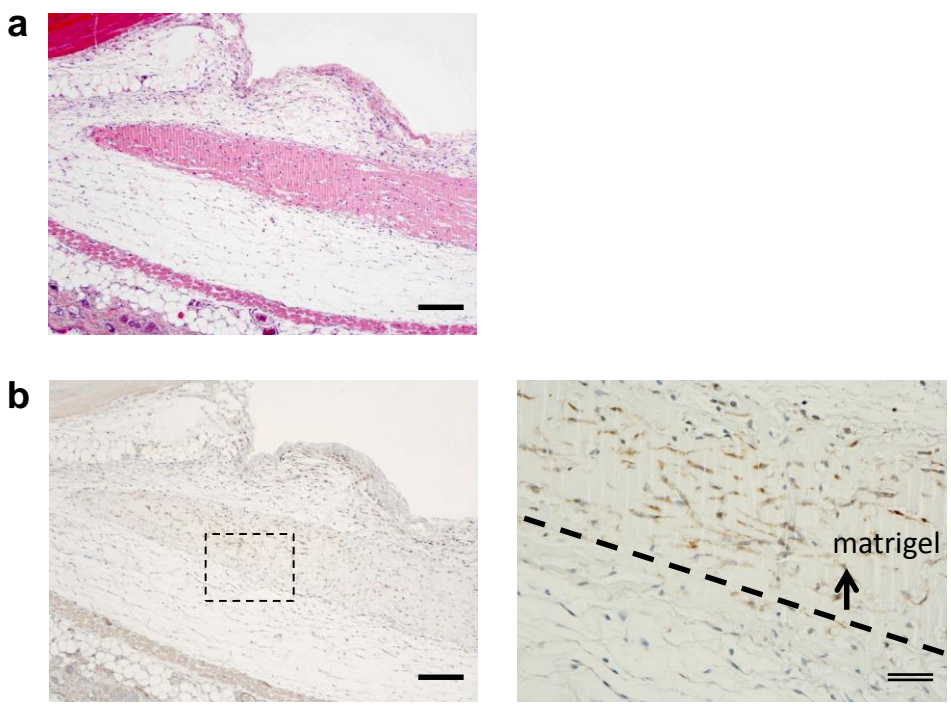

Representative immunohistochemical staining of hematoxylin and eosin (a) and carbonic anhydrase-IX (CA9) (brown) (b) in *in vivo* migration model. Scale bar, single line = 200 $\mu$ m, double line = 50 $\mu$ m.



# Figure-S7 (Takeda)

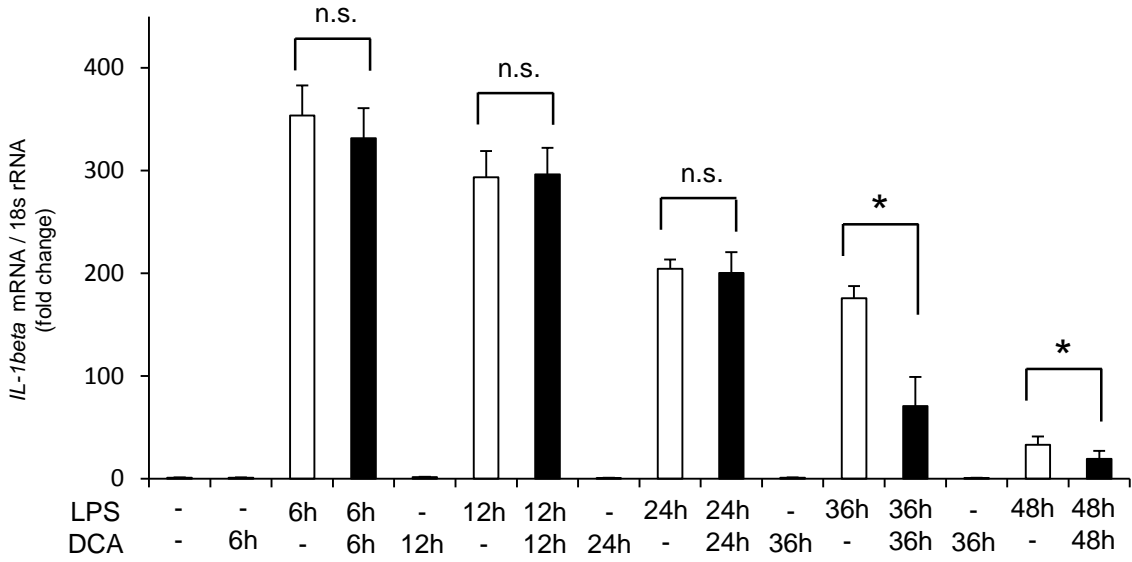

TEPMs were treated with LPS (1 mg/ml) and/or DCA (10 mM) for 6, 12, 24, 36 or 48 hours. The gene expressions of *IL-1beta* was assessed by quantitative RT-PCR. The graph indicates average with SD. \*,  $P < 0.05$ ; n.s., not significant. LPS, lipopolysaccharide; DCA, dichloroacetic acid.

# Figure-S8 (Takeda)

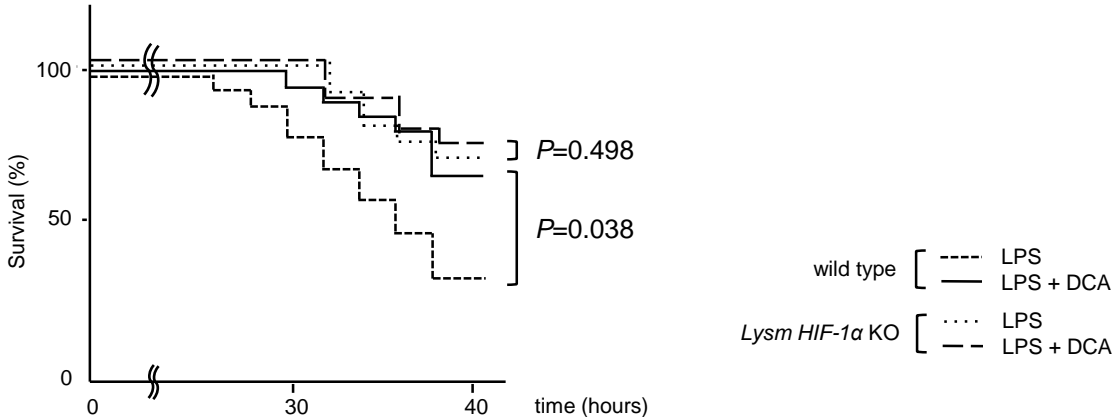

Mice were pre-treated with DCA (100 mg/kg body weight) or PBS. Endotoxin shock was induced 6h after pretreatment by the intraperitoneal injection of LPS (Sigma) (40 mg/kg body weight).  $n = 20$  animals per group.  
 wild type, *Lysm-Cre<sup>-/-</sup> HIF-1 $\alpha$ <sup>fllox/fllox</sup>* mice; *Lysm HIF-1 $\alpha$  KO*, *Lysm-Cre<sup>+/-</sup> HIF-1 $\alpha$ <sup>fllox/fllox</sup>* mice.

# Figure-S9 (Takeda)

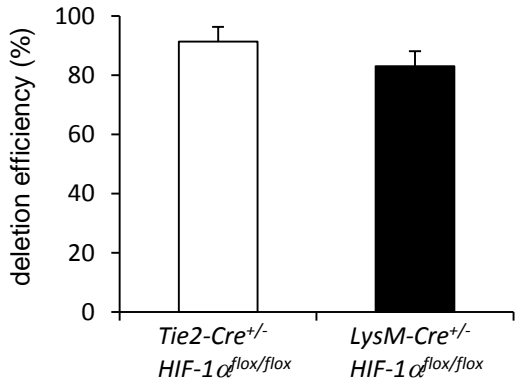

Total RNA was isolated from TEPMs and subjected to real-time PCR with primers spanning the targeted region as well as primers for an undeleted control gene for normalization. Efficiency of deletion was calculated by quantitative PCR. The graph indicates average with SD.

# Figure-S10 (Takeda)

## HIF-1 $\alpha$

M 21 8 6 4 1 (O<sub>2</sub> (%))

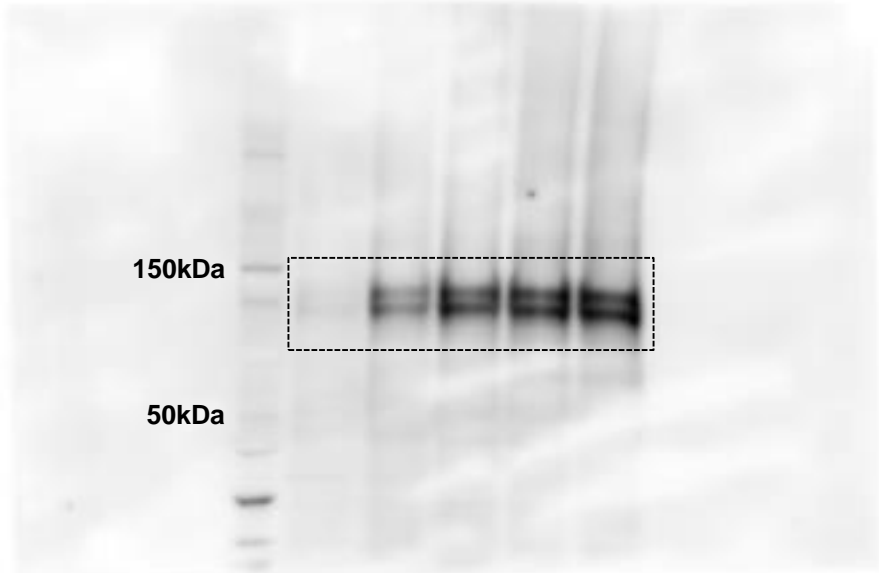

## Lamin A/C

M 21 8 6 4 1 (O<sub>2</sub> (%))

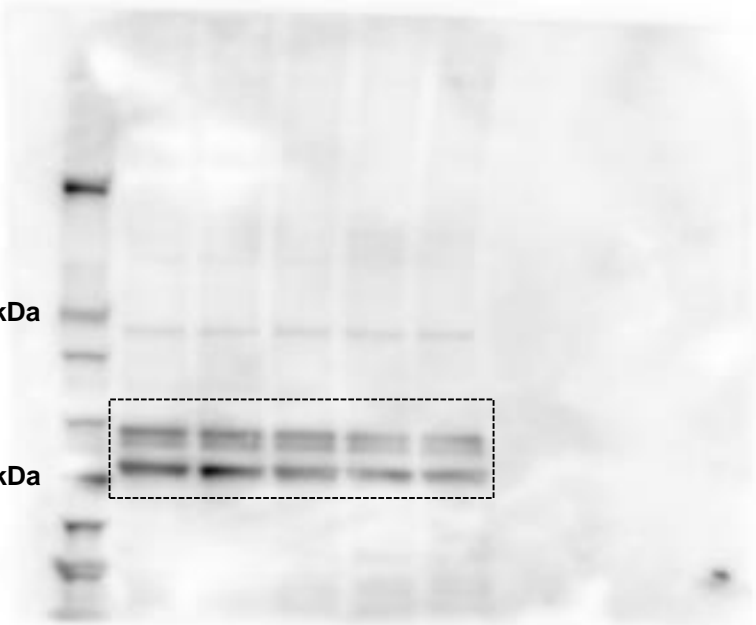

# Figure-S10 (Takeda)

## HIF-2 $\alpha$

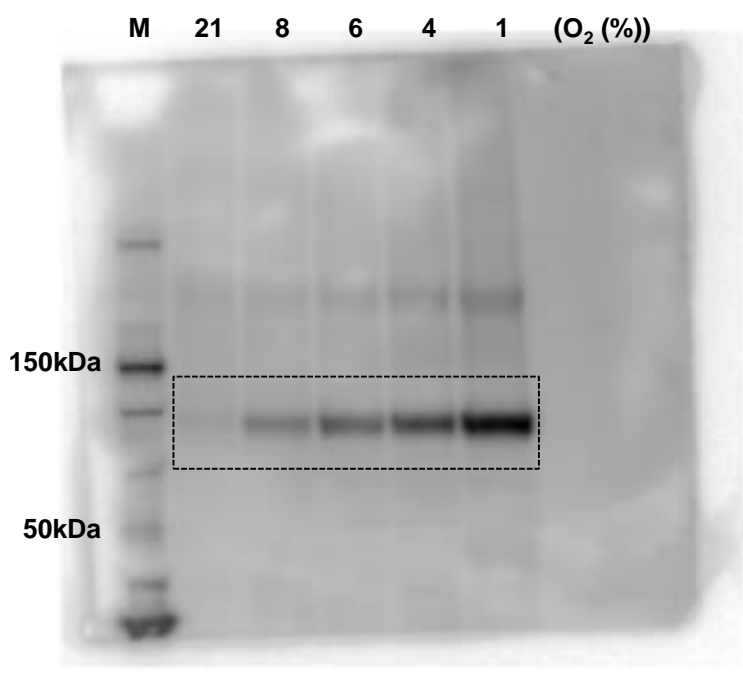

## Lamin A/C

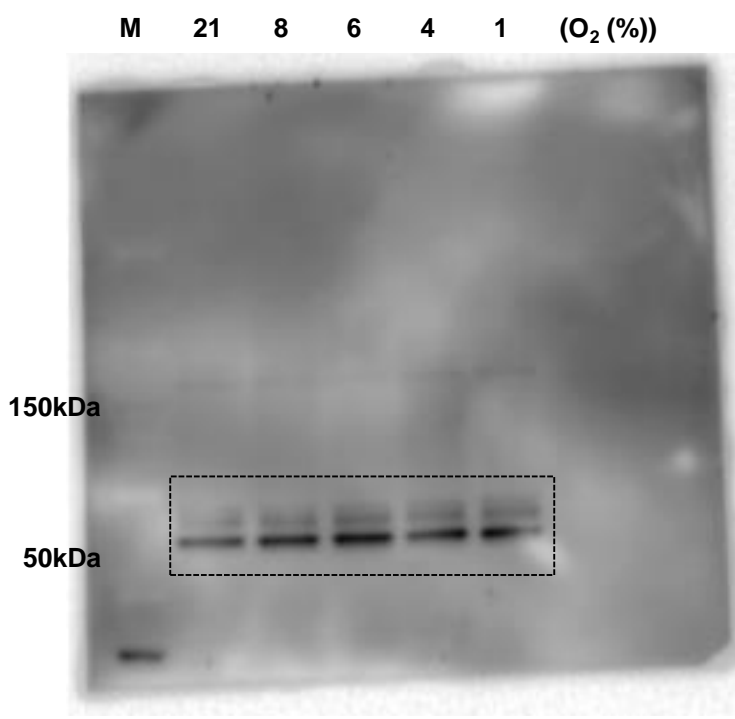

Whole images of western blots.

# Supplementary Tables

## Table-S1 (Takeda)

The mRNA half-life of hypoxia induced genes

| gene         | half-life of mRNA (hours) (average $\pm$ SD) |
|--------------|----------------------------------------------|
| <i>Pdk1</i>  | 3.3 $\pm$ 0.5                                |
| <i>Eno1</i>  | 4.3 $\pm$ 0.5                                |
| <i>Ldha</i>  | 4.7 $\pm$ 0.8                                |
| <i>Gapdh</i> | 5.3 $\pm$ 0.5                                |
| <i>Pdk3</i>  | 5.5 $\pm$ 0.4                                |
| <i>Pgk1</i>  | 5.8 $\pm$ 0.7                                |
| <i>Aldoa</i> | 6.3 $\pm$ 0.5                                |
| <i>Pfk2</i>  | 6.4 $\pm$ 0.4                                |
| <i>Tpi1</i>  | 7.3 $\pm$ 0.2                                |
| <i>Hk1</i>   | 7.7 $\pm$ 0.5                                |
| <i>Pfk1</i>  | 7.8 $\pm$ 0.4                                |
| <i>Hk2</i>   | 8.3 $\pm$ 0.5                                |
| <i>Glut2</i> | 8.5 $\pm$ 0.2                                |
| <i>Pkm1</i>  | 9.6 $\pm$ 0.4                                |
| <i>Glut1</i> | 10.1 $\pm$ 1.4                               |

# Table-S2 (Takeda)

## Primer Sequences for RNA analyses

|                                 |    |                                                             |
|---------------------------------|----|-------------------------------------------------------------|
| <i>18S</i>                      | F  | CGAAAGCATTGCCAAGAAT                                         |
| <i>18S</i>                      | R  | AGTCGGCATCGTTTATGGTC                                        |
| <i>Glut1</i>                    | F  | ATACTCATGACCATCGCGCTAG                                      |
| <i>Glut1</i>                    | R  | AAAGAAGGCCACAAAGCCAAAG                                      |
| <i>Pgk1</i>                     | F  | CTGTGGTACTGAGAGCAGCAAGA                                     |
| <i>Pgk1</i>                     | R  | CAGGACCATTCCAAACAATCTG                                      |
| <i>Ldha</i>                     | F  | TGGCAGACTTGGCTGACAG                                         |
| <i>Ldha</i>                     | R  | ACCTTCACAACATCCGAGATTC                                      |
| <i>Pdk1</i>                     | F  | GCAGCAGAGAGTAAACTGTTTG                                      |
| <i>Pdk1</i>                     | R  | TGGTCACCTGACCTCTCG                                          |
| <i>Pdk2</i>                     | F  | TGGACCGCTTCTACCTCAG                                         |
| <i>Pdk2</i>                     | R  | TCTTTCACCACATCAGACACG                                       |
| <i>Pdk3</i>                     | F  | GCCCAAGGCGTGATTGAGTA                                        |
| <i>Pdk3</i>                     | R  | GGGTTAGTGTACCACCAAAC                                        |
| <i>Pdk4</i>                     | F  | CTTTAGTTACACGTA CTCCACTG                                    |
| <i>Pdk4</i>                     | R  | ACAGACTCAGAAGATAAAGCCT                                      |
| <i>Nos2</i>                     | F  | ACCCTAAGAGTCACCAAATGGC                                      |
| <i>Nos2</i>                     | R  | TTGATCCTCACATACTGTGGACG                                     |
| <i>TNF-<math>\alpha</math></i>  | F  | CCATTCCTGAGTTCTGCAAAGG                                      |
| <i>TNF-<math>\alpha</math></i>  | R  | AGGTAGGAAGGCCTGAGATCTTATC                                   |
| <i>IL-1b</i>                    | F  | AAGTGATATTCTCCATGAGCTTTGT                                   |
| <i>IL-1b</i>                    | R  | TTCTTCTTTGGGTATTGCTTGG                                      |
| <i>Flt-1</i>                    | F  | GGCATCCCTCGGCCAACAATC                                       |
| <i>Flt-1</i>                    | R  | AGTTGCTGCTGGGATCCAGG                                        |
| <i>CXCR4</i>                    | F  | TGGAACCGATCAGTGTGAGT                                        |
| <i>CXCR4</i>                    | R  | GGGCAGGAAGATCCTATTGA                                        |
| <i>HIF-1<math>\alpha</math></i> | F  | GAAACGACCACTGCTAAGGCA                                       |
| <i>HIF-1<math>\alpha</math></i> | R  | GGCAGACAGCTTAAGGCTCCT                                       |
| <i>HIF-1<math>\alpha</math></i> | F' | GATTCGCCATGGAGGGC (for checking the deletion efficiency)    |
| <i>HIF-1<math>\alpha</math></i> | R' | AGACTCTTTGCTTCGCCGAG (for checking the deletion efficiency) |

## Primer Sequences for ChIP PCR analyses

|                                |   |                            |
|--------------------------------|---|----------------------------|
| <i>Glut1</i>                   | F | ATTTCTAAGGCCCTGGGTCC       |
| <i>Glut1</i>                   | R | CCTGCCTGATGCGTGTCA         |
| <i>Pgk1</i>                    | F | CACCTTCTACTCCTCCCCTAGTCA   |
| <i>Pgk1</i>                    | R | CACGAGACTAGTGAGACGTGCTACTT |
| <i>Ldha</i>                    | F | CCATCGTGCACTAGCGGTAC       |
| <i>Ldha</i>                    | R | TCAGTTCCCCAAAGCACAGTAG     |
| <i>Pdk1</i>                    | F | ATAGTCGCACGTCCCTGTTAC      |
| <i>Pdk1</i>                    | R | TGCGTCTTAGGTGCTTCCTTC      |
| Pgk1 distal (negative control) |   |                            |
|                                | F | GGCATTAGGGCATTGAGTTC       |
|                                | R | TCCACTCTGAATCCTGGTGA       |

## Primer Sequences to estimate the DNA content

nuclear genome

|               |   |                      |
|---------------|---|----------------------|
| <i>Ndufv1</i> | F | CTTCCCCACTGGCCTCAAG  |
| <i>Ndufv1</i> | R | CCAAAACCCAGTGATCCAGC |

mitochondria genome

|             |   |                       |
|-------------|---|-----------------------|
| <i>Cox1</i> | F | TGCTAGCCGCAGGCATTAC   |
| <i>Cox1</i> | R | GGGTGCCCAAAGAATCAGAAC |

# Table-S3 (Takeda)

Mass accuracy of the used CE-QTOF-MS system for lactate and adenine nucleotide detection. The slope and R2 values of the calibration curves are also shown.

| Compound | Formula                                                                       | <i>m/z</i>                        |                                | Error (ppm) | Calibration curve |      |
|----------|-------------------------------------------------------------------------------|-----------------------------------|--------------------------------|-------------|-------------------|------|
|          |                                                                               | Theoretical ([M-H] <sup>-</sup> ) | Observed ([M-H] <sup>-</sup> ) |             | Slope             | R2   |
| Lactate  | C <sub>3</sub> H <sub>6</sub> O <sub>3</sub>                                  | 89.0244                           | 89.0249                        | 5.62        | 715.34            | 0.99 |
| AMP      | C <sub>10</sub> H <sub>14</sub> N <sub>5</sub> O <sub>7</sub> P               | 346.0558                          | 346.0565                       | 2.02        | 1045.1            | 0.99 |
| ADP      | C <sub>10</sub> H <sub>15</sub> N <sub>5</sub> O <sub>10</sub> P <sub>2</sub> | 426.0221                          | 426.0229                       | 1.88        | 2035.4            | 0.99 |
| ATP      | C <sub>10</sub> H <sub>16</sub> N <sub>5</sub> O <sub>13</sub> P <sub>3</sub> | 505.9885                          | 505.9895                       | 1.98        | 1697.5            | 0.99 |
